# Supplementary material for: Genome-wide Profiling of Long Non-coding RNA of the Rice Blast Fungus Magnaporthe oryzae During Infection
Source: Research Square preprint supplement (doi:10.21203/rs.3.rs-677726/v1), 2021-08-20
Supplement: Supplementary file 6 [file d85655bf7ba8886f2b91c262.xlsx]

## Sheet: Sheet1
Table S4. The primers used in this study
Primer	Strand	Sequence (5' → 3')
MSTRG.1141.1-F	forward	CAAGAGATGTGATCGGAGCCCG
MSTRG.1141.1-R	reverse	GAGAAACACCCCCTTCTTACCACAGAC
MSTRG.14182.1-F	forward	CGGTTAGATTGCGATTTCGAAGAGGG
MSTRG.14182.1-R	reverse	TTGCGACAAACTACGCAACAGACC
MSTRG.1314.1-F	forward	TGATGGATCTCGAATTCGGGGTGAC
MSTRG.1314.1-R	reverse	TCATTTCAACGCCCACTGGCTCTA
MSTRG.1779.3-F	forward	TAACCCACTGCCGGCAAATCAAG
MSTRG.1779.3-R	reverse	TAAATAGTCGGCGGGTAGTGTAGGG
MSTRG.7417.5-F	forward	CCTGGTAAGCATACACGTGCGATG
MSTRG.7417.5-R	reverse	TAAAACCTGCGGATTATCCCCCCAA
MSTRG.9578.3-F	forward	TATGTTGTCCCATCATGCCTAAGTGGC
MSTRG.9578.3-R	reverse	GAGCTGCCAACGTTGTAAACCAGATG
MSTRG.9719.3-F	forward	CTCCAGACCATAGATTGTCACAGGCA
MSTRG.9719.3-R	reverse	TTTCACTTACCTCGATAACCTCGCCC
MSTRG.7770.1-F	forward	CCGACGACTTCTTCGTGGTTTGAAC
MSTRG.7770.1-R	reverse	GTCGATTCTATTGCAAATCAACCGGTCC
MSTRG.10154.1-F	forward	GGTGTTGATGATGAACCACCAGGTTG
MSTRG.10154.1-R	reverse	CTATATCAGATCGCCATGCGAATTGCC
MSTRG.7581.1-F	forward	GAGCCGGGAATTGTATTGGGCAAAAG
MSTRG.7581.1-R	reverse	TACCGTAGGGACATCACCAATCCATC
MSTRG.5505.1-F	forward	CTCCAAGTTACCCAAACCACGAAATGG
MSTRG.5505.1-R	reverse	CTTGTTTCCATACGAGTTTCTGGCTGC
MSTRG.5588.1-F	forward	CAGAACGAGATACGAGCCAGTGAC
MSTRG.5588.1-R	reverse	GGCTTCTAATGTGGGAGGGTTAGATG
MSTRG.980.1-F	forward	CGACGACGGAACGAGAAACGATTG
MSTRG.980.1-R	reverse	GCGTGACATTGATGGAAATTTGCCG
Beta-tubulin-F	forward	ACAACTTCGTCTTCGGTCAG
Beta-tubulin-R	reverse	GTGATCTGGAAACCCTGGAG
