# Supplementary material for: Genome-wide Profiling of Long Non-coding RNA of the Rice Blast Fungus Magnaporthe oryzae During Infection
Source: Research Square preprint supplement (doi:10.21203/rs.3.rs-677726/v1), 2021-08-20
Supplement: Supplementary file 9 [file 5782823ac90cc14738617dbe.docx]

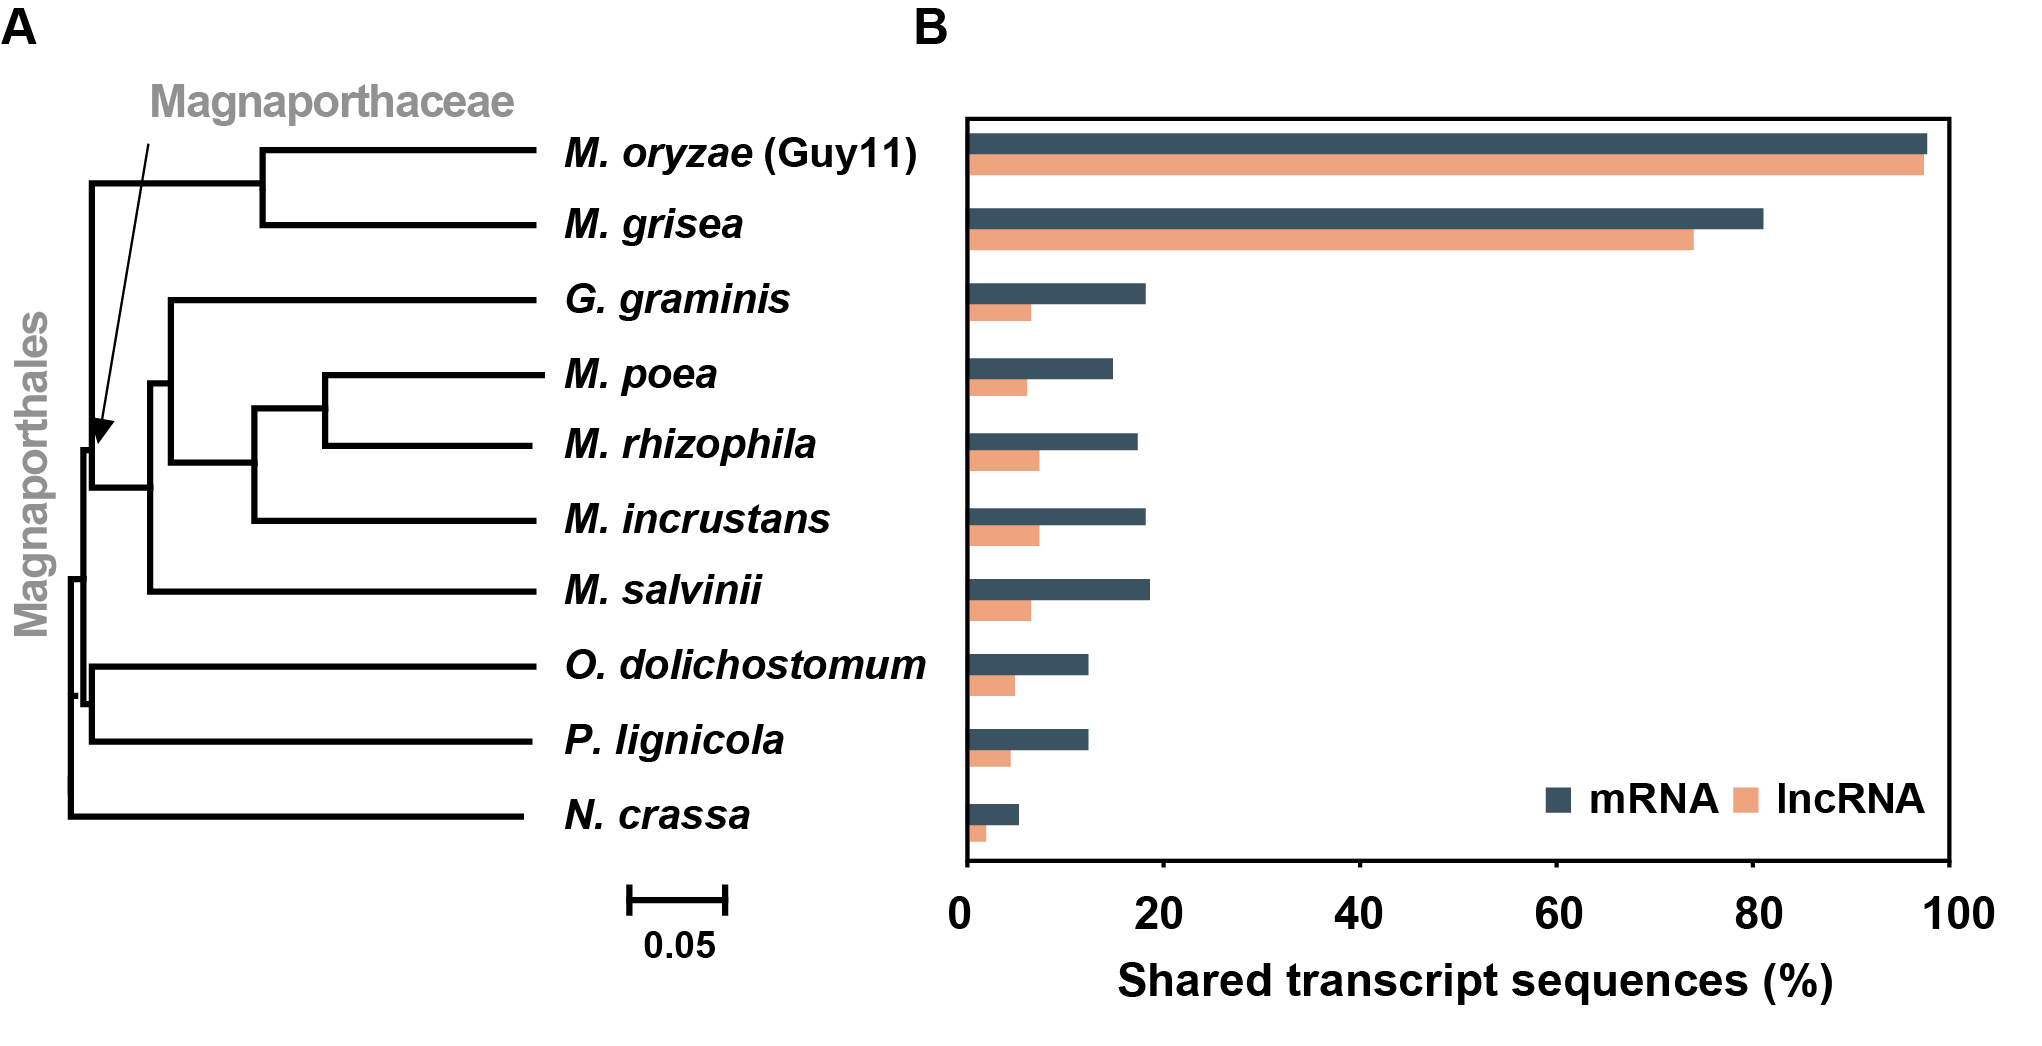


**Figure S1.** Conservation of lncRNAs among Magnaporthales species and *N*. *crassa*.

Proportion of mRNAs (bluish green) and lncRNAs (brown) identified using BLASTn and *M*. *oryzae* lncRNA sequences against the genome with an e-value cutoff < 1e-5. *M*. *oryzae*, *Magnaporthe* *oryzae*; *M*. *grisea*, *Magnaporthe* *grisea*; *G*. *gramininis*, *Gaeumannomyces* *graminis*; *M*. *poae*, *Magnaporthe* *poae*; *M*. *rhizophila*, *Magnaporthiopsis* *rhizophila*; *M*. *incrustans*, *Magnaporthiopsis* *incrustans*; *M*. *salvinii*, *Magnaporthe* *salvinii*; *O*. *dolichostomum*, *Ophioceras* *dolichostomum*; *P*. *lignicola*, *Pseudohalonectria* *lignicola*; *N*. *crassa*, *Neurospora* *crassa*.
